# Supplementary figures and images for: Parameciumswimming and ciliary beating patterns: a study on four RNA interference mutations
Source: Royal Society of Chemistry journal article supplement (doi:10.1039/c4ib00181h), 2014-11-03

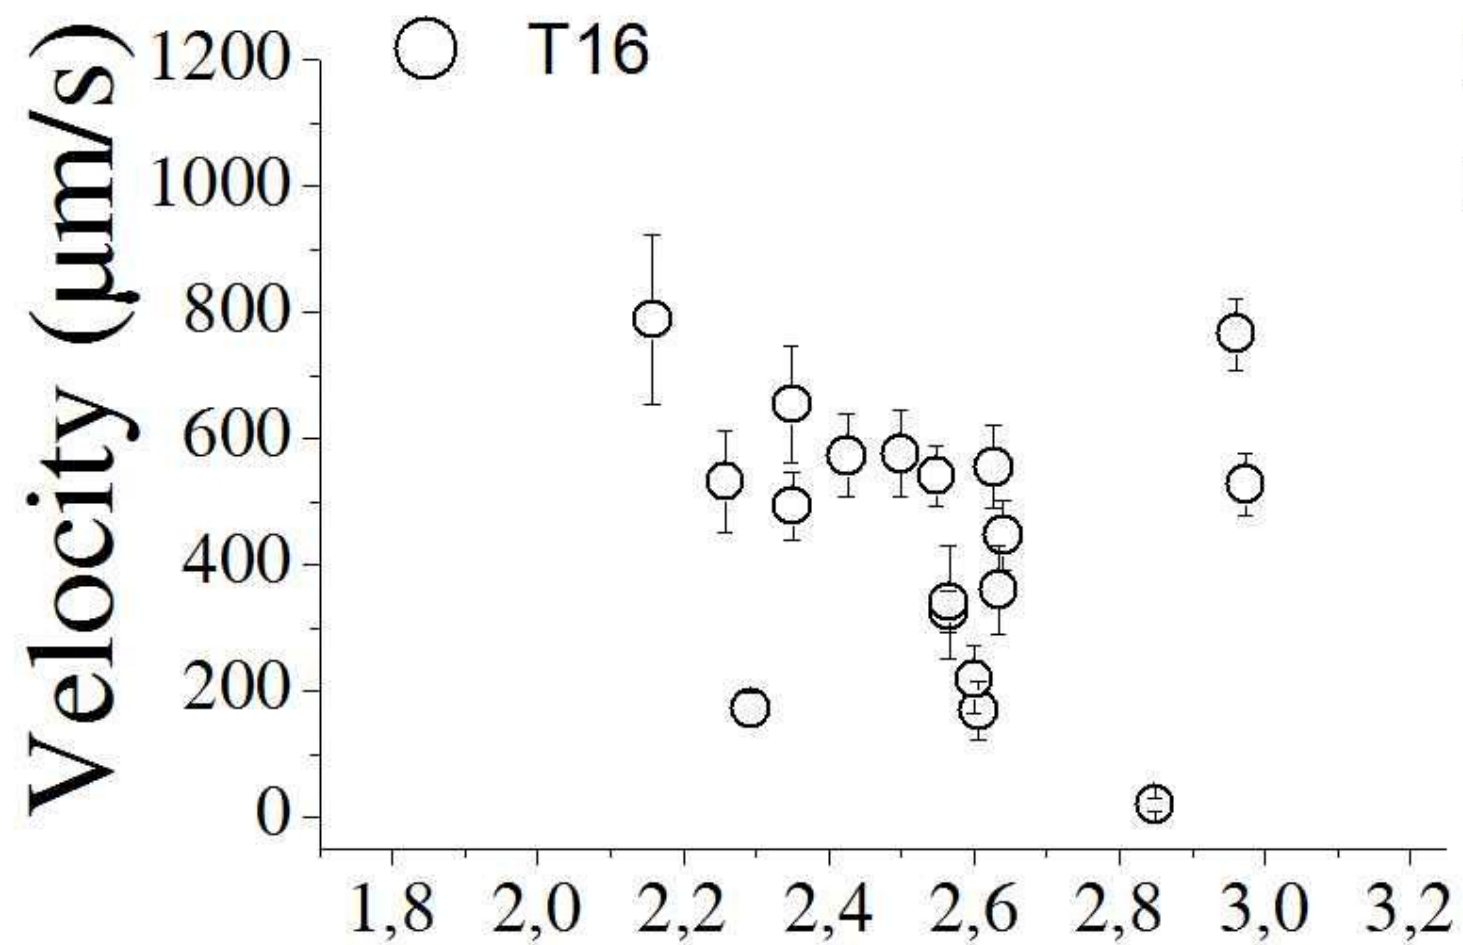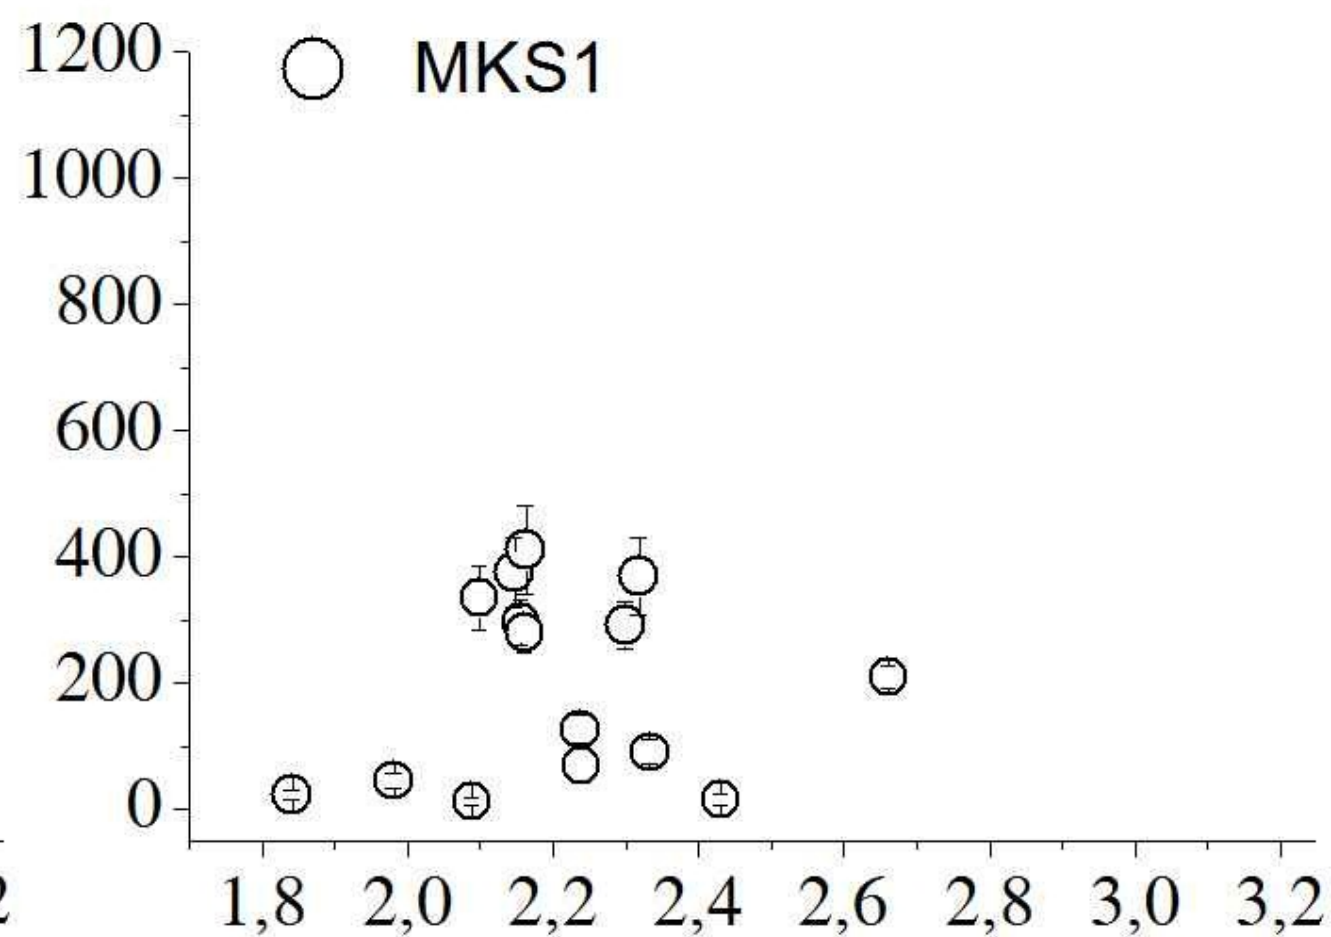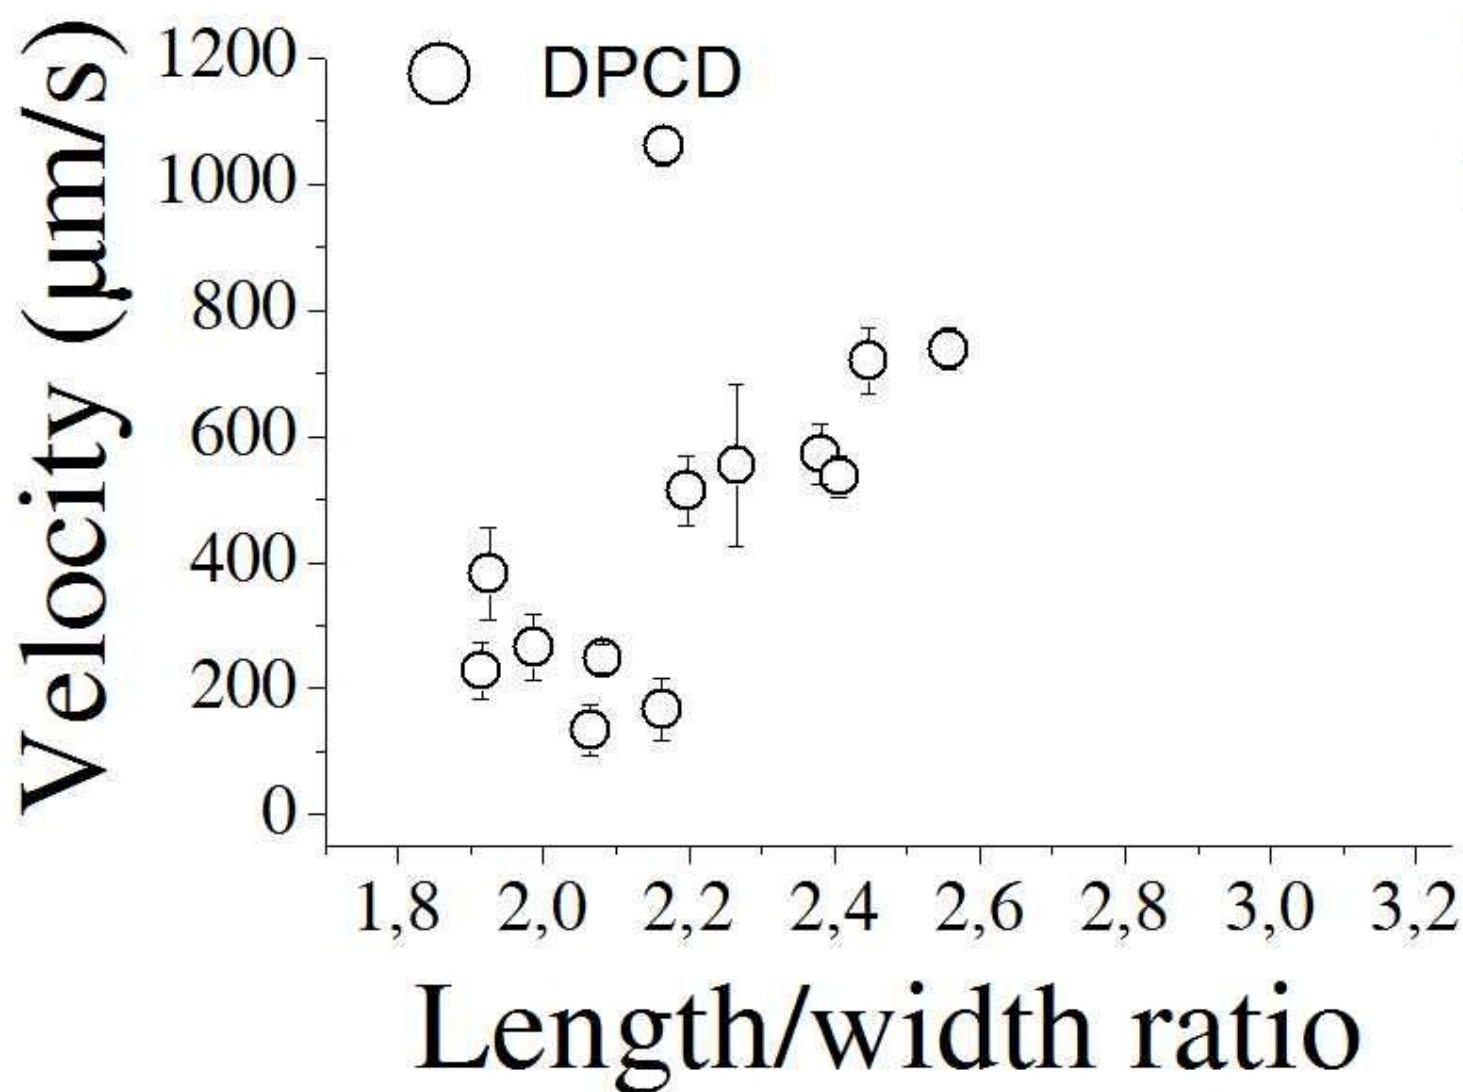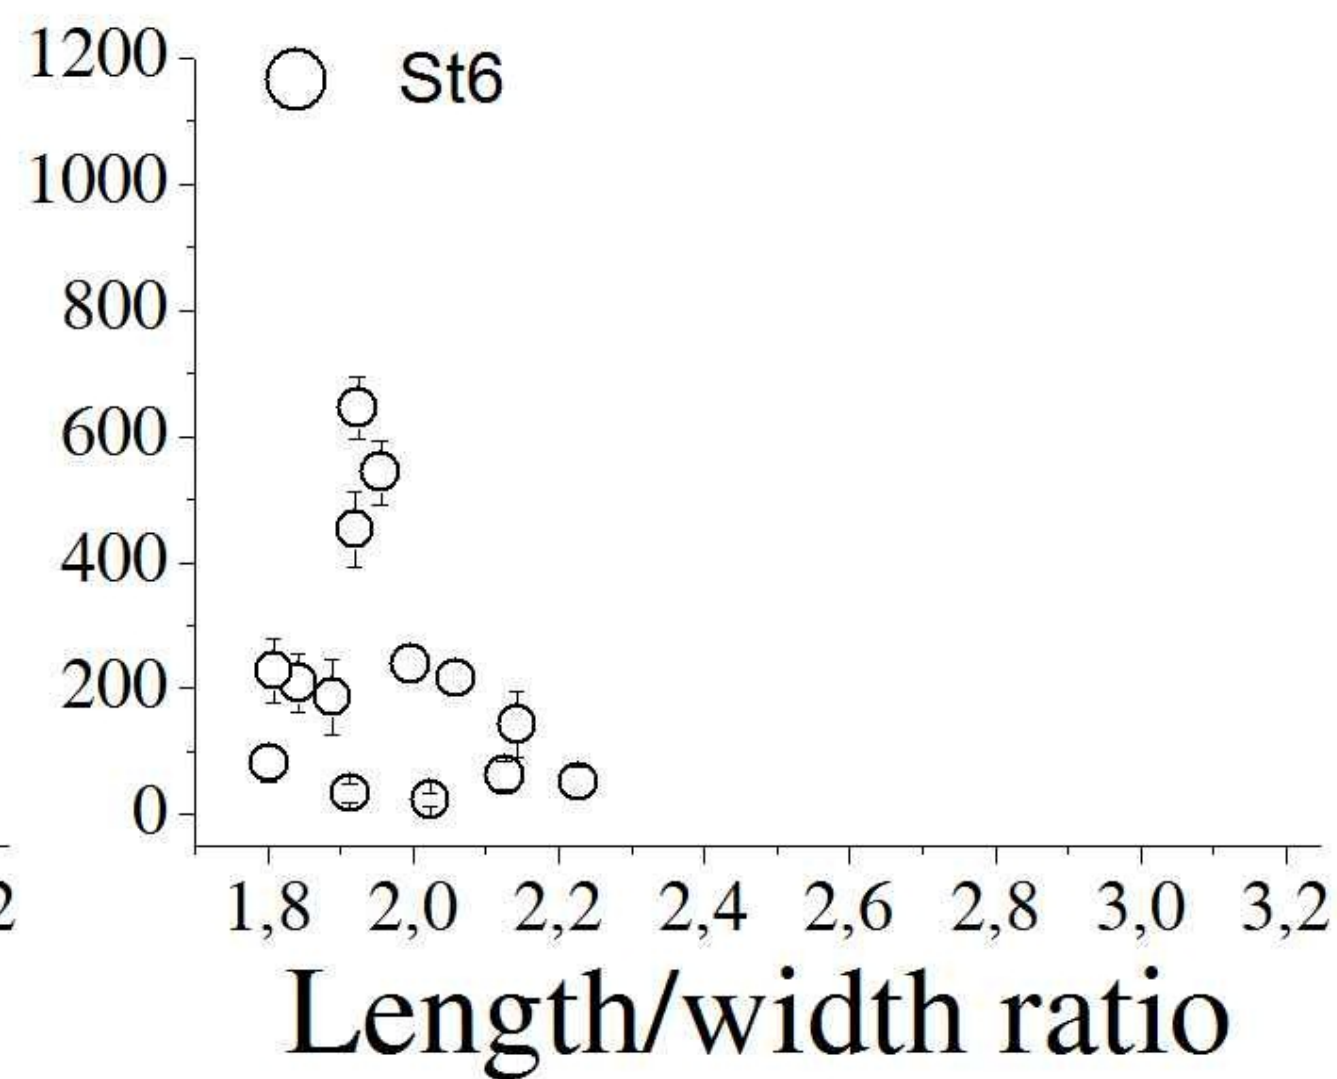

Supplement: c4ib00181h13.pdf [file c4ib00181h13.pdf]

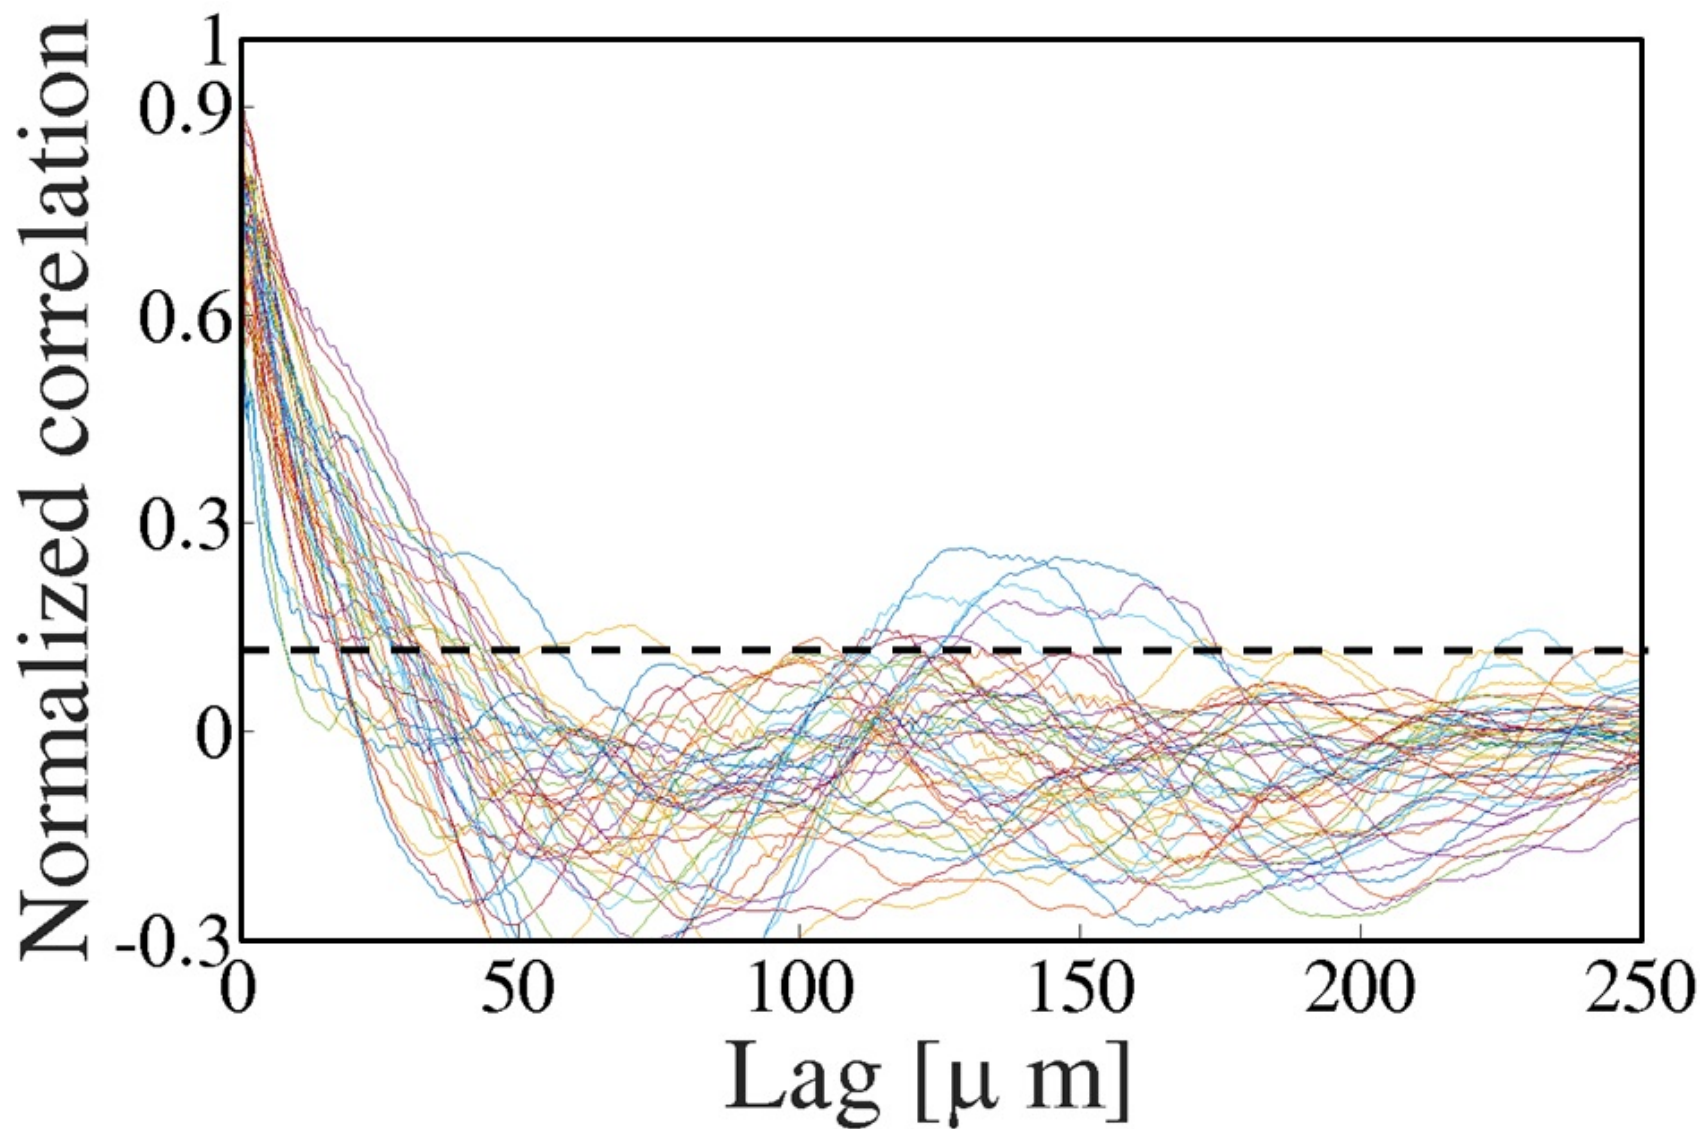

Supplement: c4ib00181h8.pdf [file c4ib00181h8.pdf]
